# Supplementary material for: Levels and Latent Profiles of Impulsivity and Health Protective Behaviors: An Adult Lifespan Analysis
Source: Research Square preprint supplement (doi:10.21203/rs.3.rs-6929793/v1), 2025-07-27
Supplement: Supplementary file 1 [file 61613133a5523d359d978a2b.docx]

**Supplementary Materials**

Table S1 Multiple regression of age predicting impulsivity traits (Full sample, *N*=653)

|  | **Positive Urgency** | | | **Negative Urgency** | | | **Lack of Perseverance** | | | **Lack of Premeditation** | | | **Sensation Seeking** | | | **Total Impulsivity** | | |
| --- | --- | --- | --- | --- | --- | --- | --- | --- | --- | --- | --- | --- | --- | --- | --- | --- | --- | --- |
|  | ***B*** | ***SE*** | ***p*** | ***B*** | ***SE*** | ***p*** | ***B*** | ***SE*** | ***p*** | ***B*** | ***SE*** | ***p*** | ***B*** | ***SE*** | ***p*** | ***B*** | ***SE*** | ***p*** |
| **Age** | −0.08 | 0.03 | .02 | −0.03 | 0.04 | .50 | −0.004 | 0.04 | .92 | −0.05 | 0.03 | .15 | −0.07 | 0.04 | .09 | −0.23 | 0.11 | .05 |
| **Age²** | 0.0005 | 0.0004 | .11 | 0.0002 | 0.0004 | .67 | −0.0002 | 0.0004 | .58 | 0.0004 | 0.0003 | .17 | 0.0004 | 0.0004 | .31 | 0.001 | 0.001 | .26 |
| **Sex** | 0.24 | 0.23 | .30 | −0.15 | 0.27 | .58 | 0.25 | 0.24 | .31 | −0.29 | 0.22 | .19 | 1.17 | 0.30 | <.001 | 1.23 | 0.79 | .12 |
| **Education** | −0.22 | 0.08 | .004 | −0.22 | 0.09 | .01 | −0.26 | 0.08 | .001 | −0.10 | 0.07 | .18 | −0.20 | 0.10 | .04 | −0.99 | 0.26 | <.001 |
| **Medical conditions** | 0.08 | 0.33 | .81 | −0.10 | 0.38 | .80 | 0.44 | 0.34 | .19 | −0.01 | 0.31 | .98 | −0.42 | 0.41 | .31 | −0.003 | 1.10 | .998 |
| ***R²*** | 0.09 | – | – | 0.021 | – | – | 0.05 | – | – | 0.01 | – | – | 0.07 | – | – | 0.09 | – | – |
| **Adjusted *R²*** | 0.09 | – | – | 0.01 | – | – | 0.05 | – | – | 0.01 | – | – | 0.06 | – | – | 0.09 | – | – |
| ***F*** | 13.51 | – | <.001 | 2.75 | – | .02 | 7.44 | – | <.001 | 1.69 | – | .14 | 9.84 | – | <.001 | 13.53 | – | <.001 |

*Note.* Sex: 1=female, 2=male; Medical conditions: 1=yes, 2=no.

Table S2 Multiple regression of impulsivity predicting health protective behaviors (Full sample, *N*=653)

|  | **Positive Urgency** | | | **Negative Urgency** | | | **Lack of Perseverance** | | | **Lack of Premeditation** | | | **Sensation Seeking** | | | **Total Impulsivity** | | |
| --- | --- | --- | --- | --- | --- | --- | --- | --- | --- | --- | --- | --- | --- | --- | --- | --- | --- | --- |
|  | ***B*** | ***SE*** | ***p*** | ***B*** | ***SE*** | ***p*** | ***B*** | ***SE*** | ***p*** | ***B*** | ***SE*** | ***p*** | ***B*** | ***SE*** | ***p*** | ***B*** | ***SE*** | ***p*** |
| **Intercept** | 41.50 | 2.39 | <.001 | 41.22 | 1.983 | <.001 | 41.36 | 2.06 | <.001 | 38.13 | 1.99 | <.001 | 39.49 | 2.23 | <.001 | 38.56 | 4.14 | <.001 |
| **Impulsivity** | –0.06 | 0.48 | .90 | –0.30 | 0.417 | .48 | –0.20 | 0.48 | .68 | 0.73 | 0.49 | .14 | 0.26 | 0.42 | .54 | 0.23 | 0.19 | .23 |
| **Impulsivity2** | –0.02 | 0.03 | .57 | 0.01 | 0.024 | .83 | –0.01 | 0.03 | .81 | –0.08 | 0.03 | .02 | –0.02 | 0.02 | .23 | –0.005 | 0.002 | .05 |
| **Age** | 0.03 | 0.01 | .04 | 0.04 | 0.013 | .005 | 0.03 | 0.01 | .02 | 0.04 | 0.01 | .005 | 0.03 | 0.01 | .01 | 0.02 | 0.01 | .06 |
| **Sex** | –1.08 | 0.56 | .06 | –1.19 | 0.567 | .04 | –1.08 | 0.56 | .06 | –1.27 | 0.56 | .02 | –0.87 | 0.57 | .13 | –1.03 | 0.56 | .06 |
| **Education** | 0.3 | 0.08 | .004 | 0.27 | 0.177 | .13 | 0.24 | 0.18 | .18 | 0.27 | 0.17 | .13 | 0.26 | 0.18 | .14 | 0.15 | 0.18 | .40 |
| **Medical conditions** | 2.38 | 0.78 | .002 | 2.33 | 0.786 | .003 | 2.48 | 0.78 | .002 | 2.41 | 0.78 | .002 | 2.23 | 0.78 | .005 | 2.43 | 0.77 | .002 |
| ***R²*** | 0.06 | – | – | 0.05 | – | – | 0.06 | – | – | 0.07 | – | – | 0.06 | – | – | 0.09 | – | – |
| **Adjusted *R²*** | 0.05 | – | – | 0.04 | – | – | 0.05 | – | – | 0.06 | – | – | 0.05 | – | – | 0.08 | – | – |
| ***F*** | 7.07 | – | <.001 | 5.94 | – | <.001 | 6.86 | – | <.001 | 8.40 | – | <.001 | 6.88 | – | <.001 | 10.5 | – | <.001 |

*Note.* Sex: 1=female, 2=male; Medical conditions: 1=yes, 2=no.

Table S3 Interaction between sensation seeking and four-dimension impulsivity predicting protective behaviors (Full sample, *N*=653)

|  | ***B (SE)*** | ***t*** | ***p*** |
| --- | --- | --- | --- |
| Intercept | 40.18 (3.31) | 12.13 | < .001 |
| Sensation Seeking | 0.53(0.31) | 1.75 | .08 |
| Four-dimension impulsivity | 0.11 (0.10) | 1.02 | .31 |
| Sex | -0.99 (0.56) | -1.77 | .08 |
| Education | 0.15 (0.17) | 0.86 | .39 |
| Medical conditions | 2.41 (0.77) | 3.13 | .002 |
| Age | 0.02 (0.01) | 1.71 | .09 |
| Sensation Seeking **× Four-dimension impulsivity** | -0.02 (0.01) | -2.47 | .01 |

*Note.* Four-dimension impulsivity = the total score of the positive and negative urgency, lack of premeditation, and lack of perseverance facets of impulsivity.


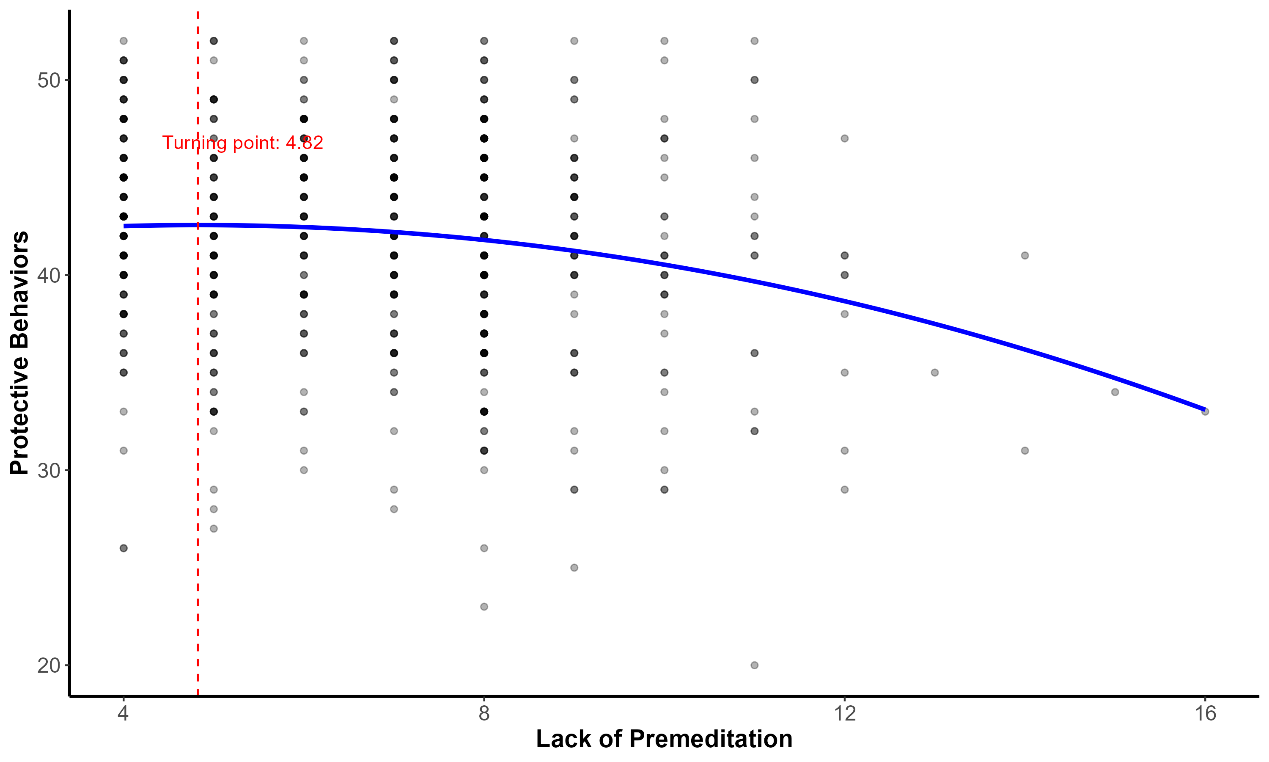


Fig. S1 Quadratic association between lack of premeditation and health protective behaviors


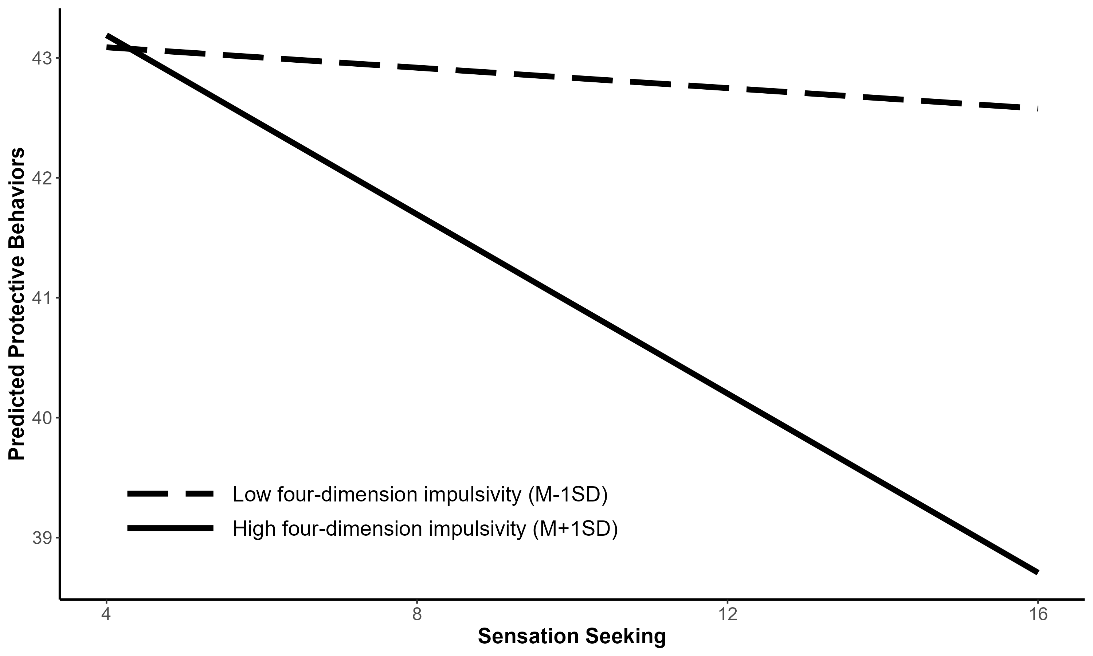


Fig. S2 Interaction between sensation seeking and four-dimension impulsivity predicting protective behaviors. *Note.* Four-dimension impulsivity = the total score of the positive and negative urgency, lack of premeditation, and lack of perseverance facets of impulsivity.
